# Supplementary material for: Shear-induced dynamics of an active Belousov–Zhabotinsky droplet
Source: Royal Society of Chemistry journal article supplement (doi:10.1039/d4sm01464b), 2025-01-01
Supplement: d4sm01464b6.pdf [file d4sm01464b6.pdf]

## Supplementary Information

# Shear-induced Dynamics of an Active Belousov-Zhabotinsky Droplet

Shreyas A. Shenoy,<sup>a</sup> Chaithanya KVS,<sup>a,b</sup> and Pratyush Dayal<sup>\*a</sup>

<sup>a</sup>Polymer Engineering Research Lab (PERL), Department of Chemical Engineering, Indian Institute of Technology Gandhinagar, Gandhinagar, India - 382355.

<sup>b</sup>Present address: School of Life Sciences, University of Dundee, Dundee, UK – DD1 4HN.

\*Email: pdayal@iitgn.ac.in

### S1. Synchronous oscillations in concentration $c_1$ and droplet's swimming speed $V_d$

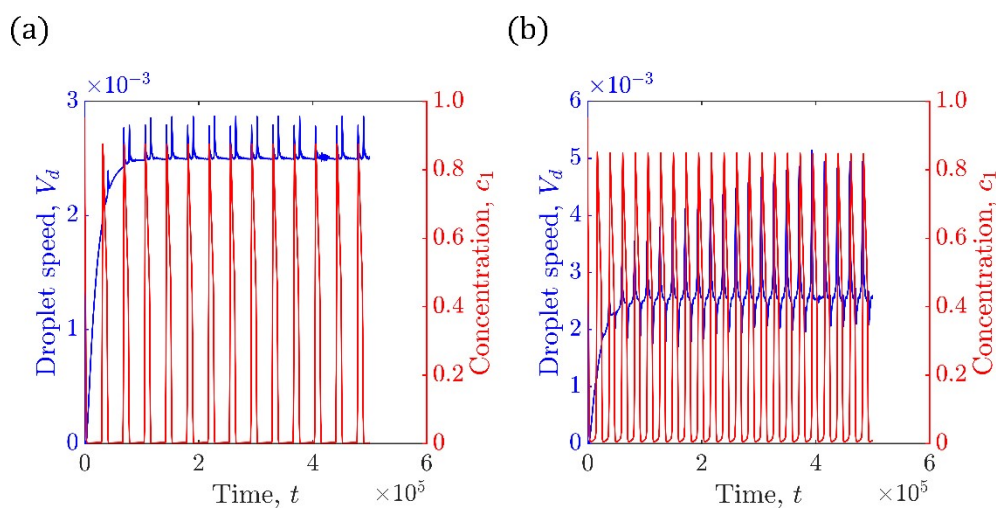

Figure S1.: Time evolution of droplet's swimming speed  $V_d$  and concentration  $c_1$  in the presence of shear flow of strength  $V_w = 0.005$  at (a)  $\Delta\kappa = 0.3$  and (b)  $\Delta\kappa = -0.3$

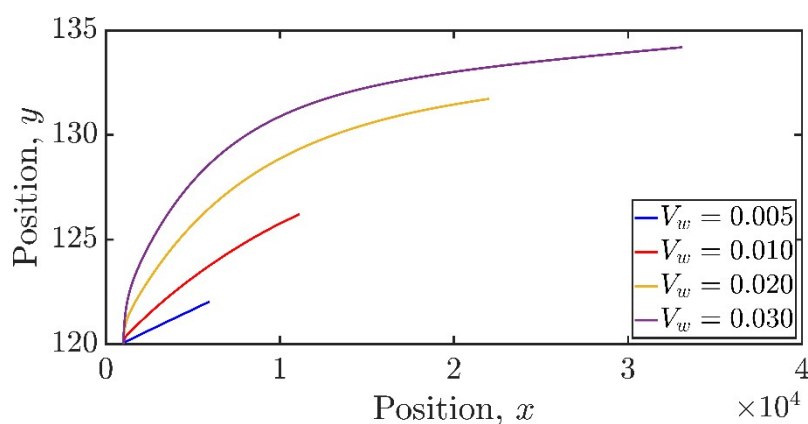

Figure S2: Trajectories of a passive droplet ( $\Delta\kappa = 0$ ) placed initially at the channel centre at varying shear flow strengths

### S2. Trajectories of a passive droplet at varying shear flow strengths

### S3. Movie-1

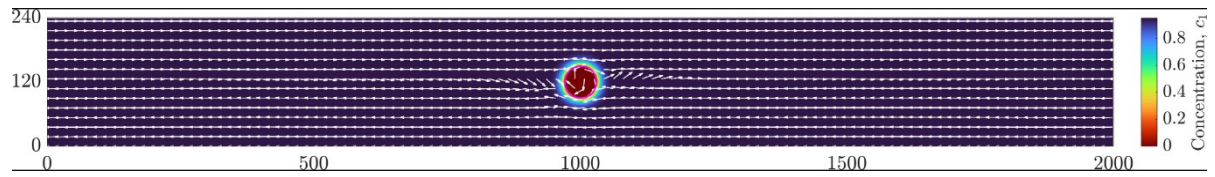

The movie shows the motion of active BZ droplet ( $\Delta\kappa = 0$ ) in the channel subjected to a shear flow of strength  $V_w = 0.005$ . The velocity field shown is in droplet's frame.

### S4. Movie-2

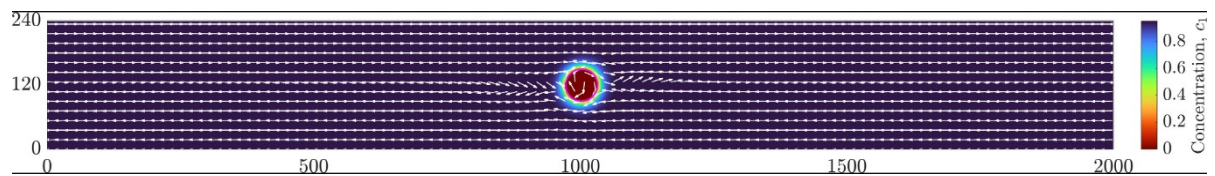

The movie shows the motion of active BZ droplet ( $\Delta\kappa = 0.3$ ) in the channel subjected to a shear flow of strength  $V_w = 0.005$ . The velocity field shown is in droplet's frame.

### S5. Movie-3

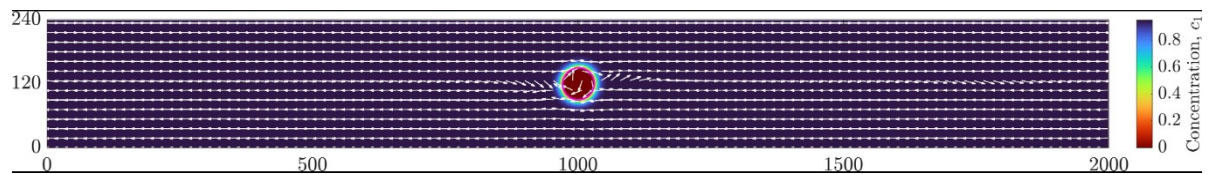

The movie shows the motion of active BZ droplet ( $\Delta\kappa = 0.3$ ) in the channel subjected to a shear flow of strength  $V_w = 0.020$ . The velocity field shown is in droplet's frame.

### S6. Movie-4

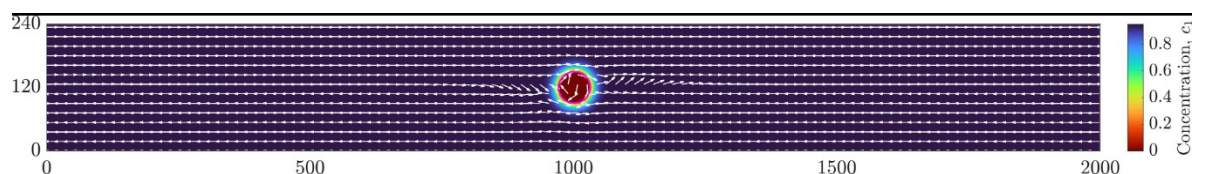

The movie shows the motion of active BZ droplet ( $\Delta\kappa = -0.3$ ) in the channel subjected to a shear flow of strength  $V_w = 0.005$ . The velocity field shown is in droplet's frame.

### S7. Movie-5

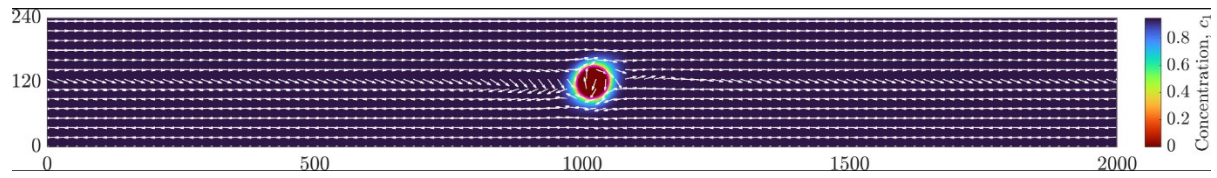

The movie shows the motion of active BZ droplet ( $\Delta\kappa = -0.3$ ) in the channel subjected to a shear flow of strength  $V_w = 0.020$ . The velocity field shown is in droplet's frame.
